# Supplementary material for: Estimating the total prevalence and incidence of end-stage kidney disease among Aboriginal and non-Aboriginal populations in the Northern Territory of Australia, using multiple data sources
Source: BMC Nephrol. 2018 Jan 15;19:15. doi: 10.1186/s12882-017-0791-3 (PMC5769509; doi:10.1186/s12882-017-0791-3)
Supplement: Supplementary file 5 — Number of prevalent ESKD cases in 3 data sources, non-Aboriginal population, Northern Territory 2013. (DOCX 16 kb) [file 12882_2017_791_MOESM5_ESM.docx]

**Additional file 5: Number of prevalent ESKD cases in 3 data sources, non-Aboriginal population, Northern Territory 2013**

| **ANZDATA** | **HSD** | **BDM** | **Frequency** |
| --- | --- | --- | --- |
| No | No | No | 23* |
| Yes | 1 |
| Yes | No | 36 |
| Yes | 1 |
| Yes | No | No | 30 |
| Yes | 0 |
| Yes | No | 59 |
| Yes | 5 |
| Total |  |  | 132 |

*Estimated number from a log-linear capture recapture model based on the number of patients in the HSD, ANZDATA and BDM.
